# Supplementary material
Source: PubMed Central journal article supplement (PMC6249587)
Supplement: jiy485_suppl_supplementary_material.pdf [file jiy485_suppl_supplementary_material.pdf]

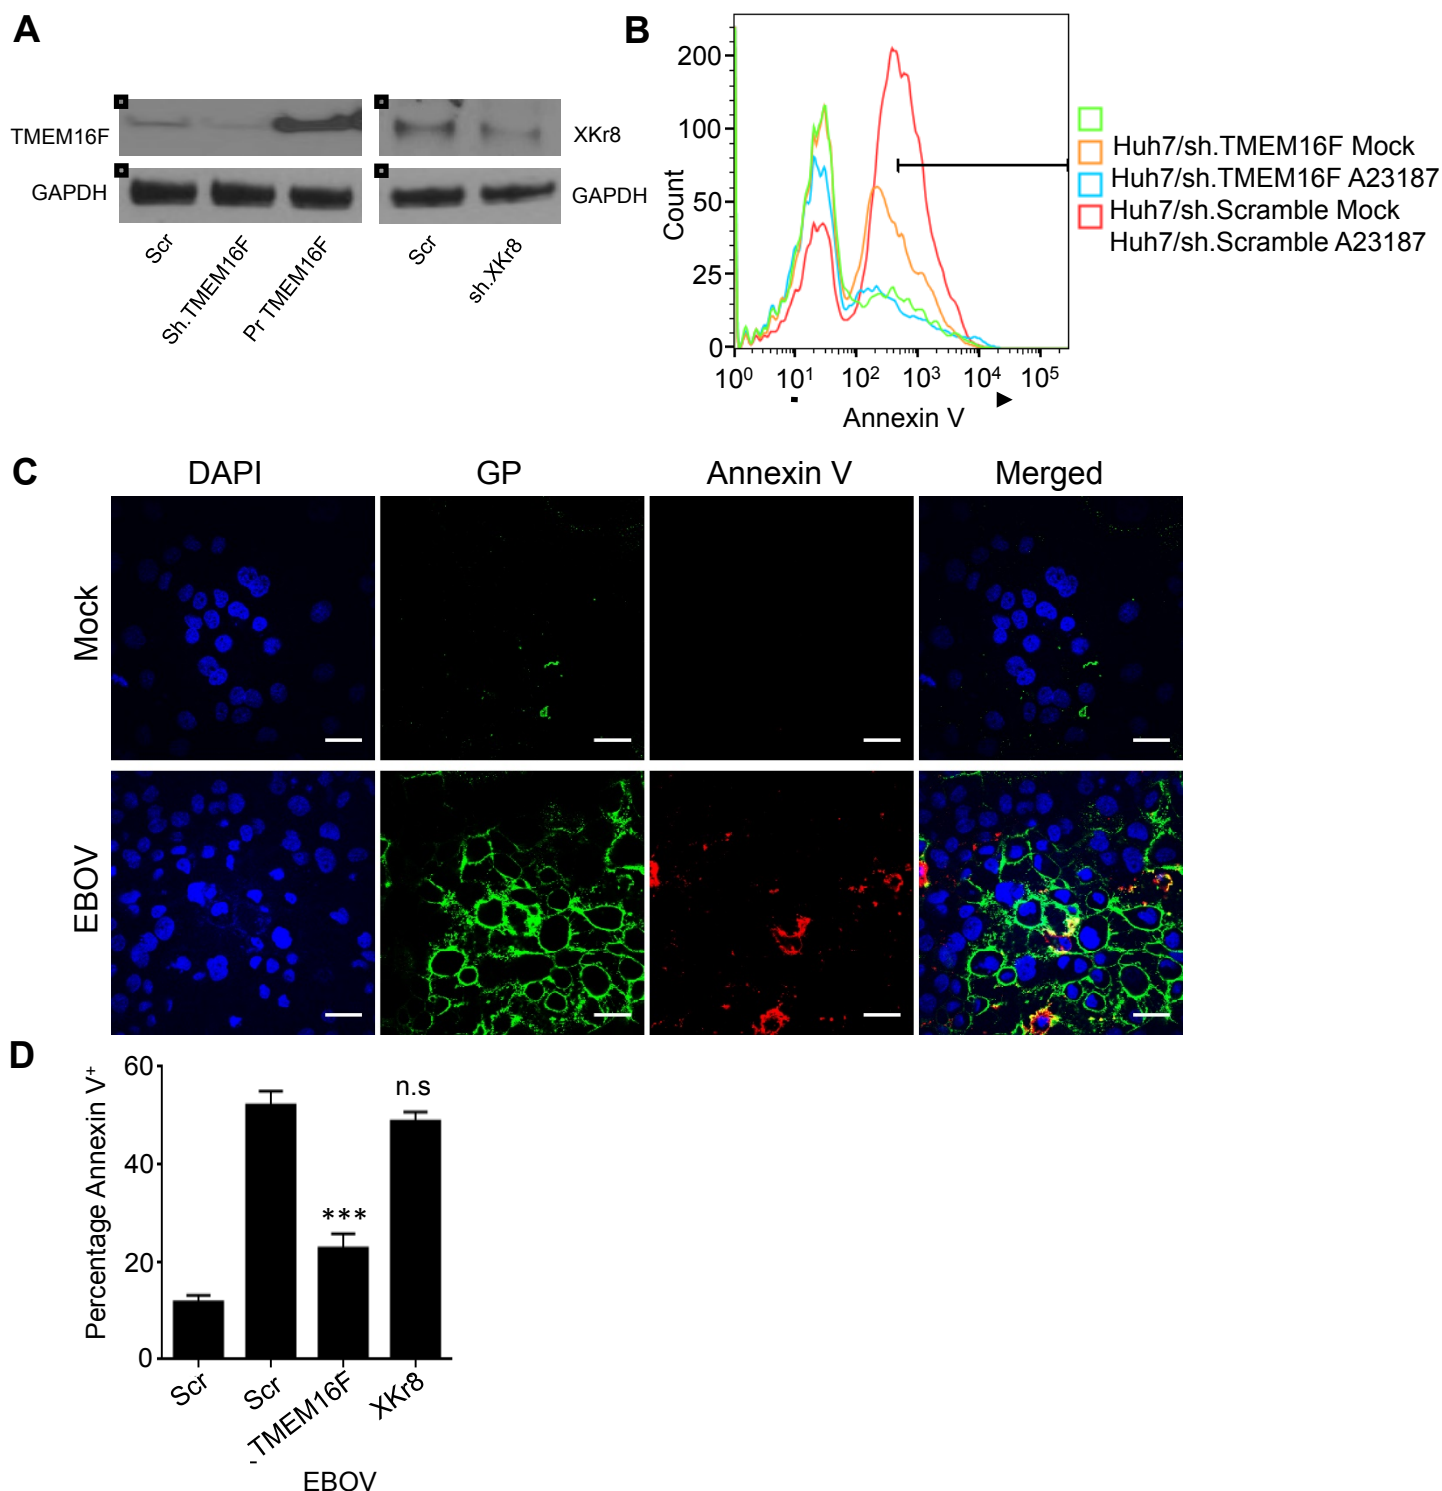

**Supplementary Figure 1. Additional sh.RNA cell line data.** (A) Western blot analysis performed on sh.RNA cell lines to determine the relative knockdown of the indicated target genes following lentiviral transduction and puromycin selection. Pr TMEM16F, cells transfected with a plasmid encoding TMEM16F. (B) Functional assays demonstrating sh.RNA targeting TMEM16F reduces PtdSer translocation following the addition of ionophore A23187. Gate shown was used to compare expression levels. (C) shRNA-mediated knockdown of XKr8 does not reduce surface expression of PS following infection with EBOV. Images of cells transduced with lentiviral vectors encoding scrambled shRNA are provided in Figure 1A; confocal microscopy analyses of all cell lines were performed at the same time. Scale bar = 30  $\mu$ m. (D) Flow cytometry analysis of annexin V staining in EBOV-infected cells. \*\*\*  $P < 0.001$ , n.s: not significant (Student's t-test). Panels A – C, representative of 3 independent experiments, panel D, representative averages from triplicate samples of one of 5 independent experiments.

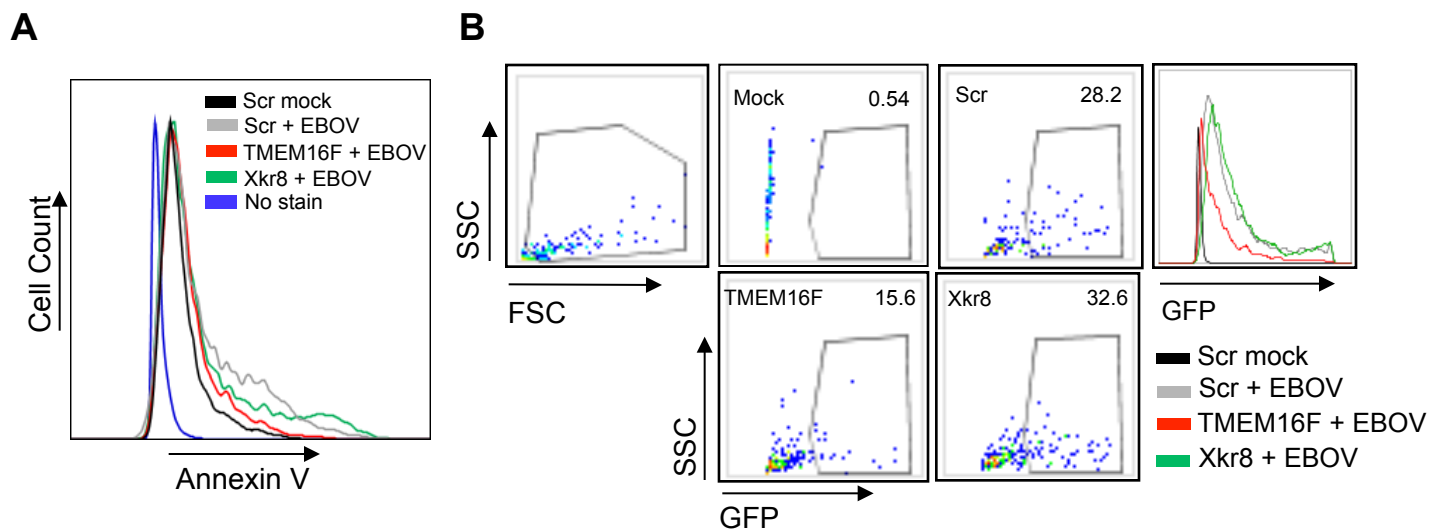

**Supplementary Figure 2. Annexin V staining on EBOV-infected sh.RNA cell lines. (A)** Annexin V staining on EBOV-infected sh.RNA cell lines. **(B)** Gating strategy used to determine viral infectivity and annexin V expression. Cells were gated away from debris based on FSC vs SSC. Plots for GFP versus SSC were used to determine the percentage of infected (GFP<sup>+</sup>) cells. For comparison of multiple samples in one plot, data was converted to histograms. Panels A, B are representative of one out of three independent experiments.

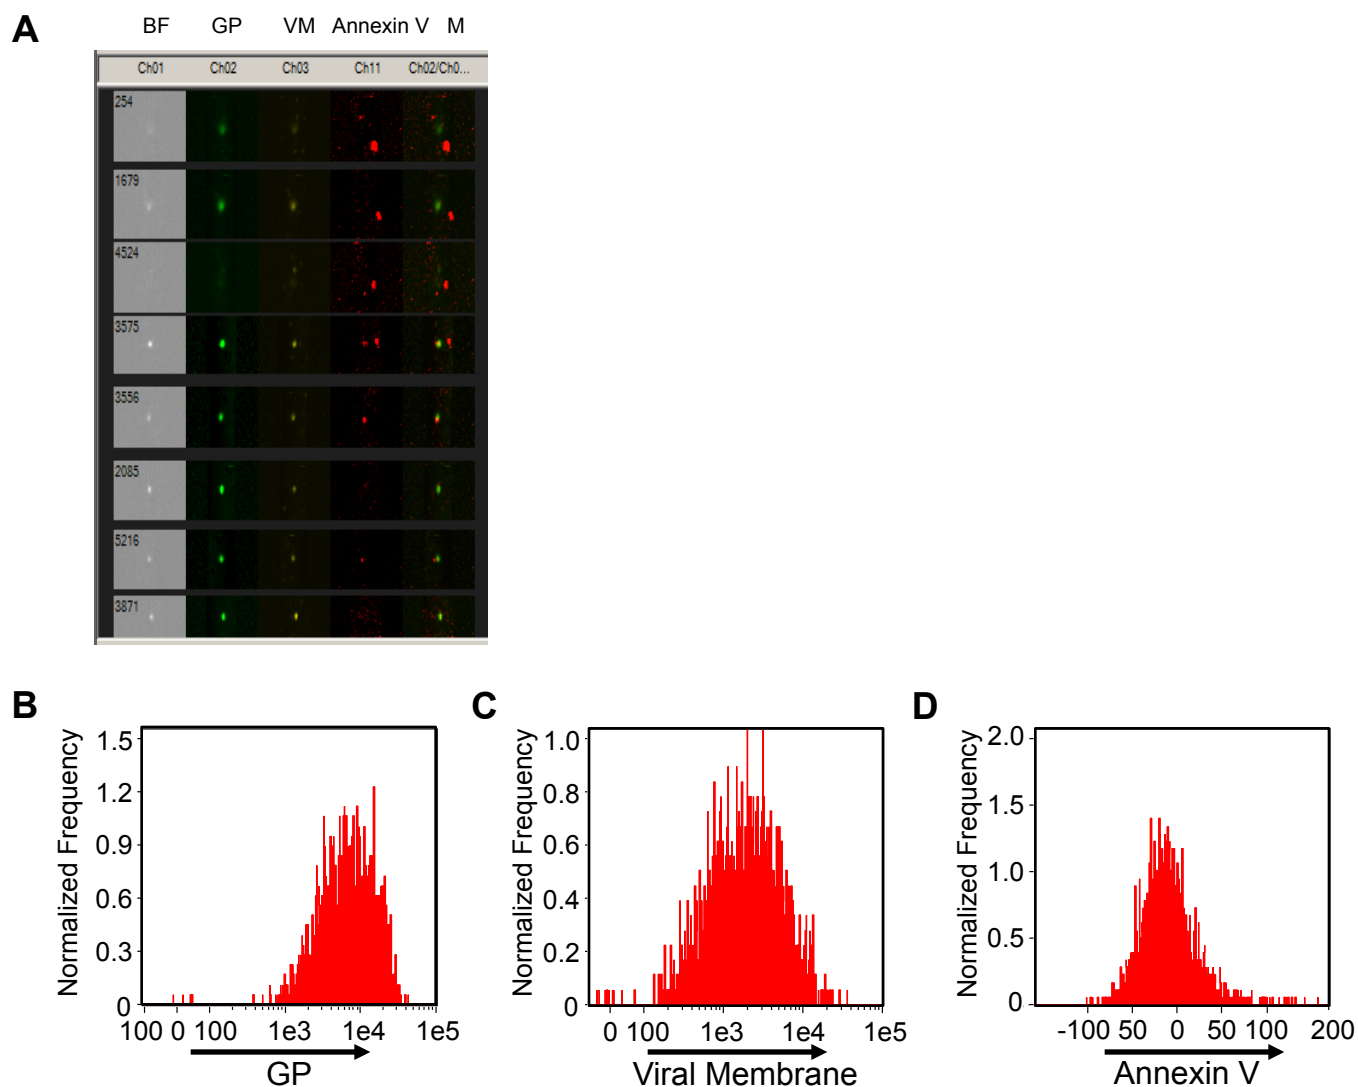

**Supplementary Figure 3. Development of virion surface protein detection assay.** (A-D) Examples of purified VLP characterization by imaging flow cytometry. (A) VLPs stained for GP: bright field (channel 1: BF), EBOV GP (channel 2: GP), viral membrane (channel 3: VM) and annexin V (channel 11); M, merged images based on GP, viral membrane and annexin V. (B-D) Histograms showing relative GP expression (B), viral membrane dye via staining with PKH26 (C) and annexin V (D).
